# Supplementary material for: Mir-302a/TWF1 Axis Impairs the Myogenic Differentiation of Progenitor Cells through F-Actin-Mediated YAP1 Activation
Source: MDPI journal article supplement (doi:10.3390/ijms24076341), 2023-03-28
Supplement: s1 [file s1]

**Table S1. Oligonucleotide sequences for transfection**

| Gene                | Primer sequence (5'-3')  |
|---------------------|--------------------------|
| scRNA (control RNA) | UCACAACCUCCUAGAAAGAGUAGA |
| TWF1 siRNA (siTWF1) | CGUUACCAUUUCUUUCUGUUU    |
| miR-302a            | UAAGUGCUUCCAUGUUUUGGUGA  |
| antimiR-302         | UCACCAAACAUGGAAGCACUUA   |

**Table S2. Primer lists and conditions for *q*RT-PCR and cloning**

(A) Mouse primer lists for *q*RT-PCR and RT-PCR

| Gene  | Primer sequence (5′-3′) |                         | Product size | Annealing Temperature | Concentration |        | Cycle |
|-------|-------------------------|-------------------------|--------------|-----------------------|---------------|--------|-------|
|       |                         |                         |              |                       | cDNA          | Primer |       |
| U6    | F.P                     | CTCGCTTCGGCAGCACA       | 94           | 58                    | 2 ng/μl       | 0.5 μM | 40    |
|       | R.P                     | AACGCTTCACGAATTTGCGT    |              |                       |               |        |       |
| PCNA  | F.P                     | GAACCTGCAGAGCATGGACTC   | 201          | 58                    |               |        |       |
|       | R.P                     | GGTGTCTGCATTATCTTCAGCCC |              |                       |               |        |       |
| CCNB1 | F.P                     | GAGCTATCCTCATTGACTGG    | 125          | 58                    |               |        |       |
|       | R.P                     | CATCTTCTTGGGCACACAAC    |              |                       |               |        |       |
| CCND1 | F.P                     | ACCAATCTCCTCAACGACCG    | 228          | 58                    |               |        |       |
|       | R.P                     | ACGGAAGGGAAGAGAAGGG     |              |                       |               |        |       |

(B) Primer lists for wild-type and mutant 3'UTR cloning

| Gene                | Primer sequence (5′-3′) |                         | Product size | Annealing Temperature | Concentration |        | Cycle |
|---------------------|-------------------------|-------------------------|--------------|-----------------------|---------------|--------|-------|
|                     |                         |                         |              |                       | cDNA          | Primer |       |
| TWF1 <sub>wt</sub>  | F.P                     | AGTCCAGCTTTTAGTACAGG    | 262          | 58                    | 2 ng/μl       | 0.5 μM | 35    |
|                     | R.P                     | TCTAGAACTGGCCCAACT      |              |                       |               |        |       |
| TWF1 <sub>mut</sub> | F.P                     | AGTCCAGCTTTTAGTACAGG    | 97           |                       |               |        |       |
|                     | R.P                     | AGAAGTGAAACCGGCTATTTTCC |              |                       |               |        |       |
|                     | F.P                     | GGAAAATAGCCGGTTTCACTTCT | 188          |                       |               |        |       |
|                     | R.P                     | TCTAGAACTGGCCCAACT      |              |                       |               |        |       |

**Table S3. Antibodies list**

| Antibody                              | Type       | Targeted species | Manufacturer                                          | Cat. No.   | Dilution ratio* |
|---------------------------------------|------------|------------------|-------------------------------------------------------|------------|-----------------|
| TWF1                                  | Polyclonal | Rabbit           | Proteintech, Rosemont, Illinois, USA                  | 11732-1-AP | 1:5,000         |
| MyHC                                  | Monoclonal | Mouse            | DSHB, Iowa, IA, USA                                   | MF20       | 1:1,000         |
| MyoD                                  | Monoclonal | Mouse            | Santa Cruz Biotechnology, Dallas, TX, USA             | sc-377460  | 1:1,000         |
| MyoG                                  | Monoclonal | Mouse            | Santa Cruz Biotechnology, Dallas, TX, USA             | sc-12732   | 1:1,000         |
| YAP1                                  | Monoclonal | Rabbit           | Cell Signaling Technology, Danvers, MA, USA           | 14074S     | 1:10,000        |
| p-YAP1                                | Polyclonal | Rabbit           | Cell Signaling Technology, Danvers, MA, USA           | 4911S      | 1:10,000        |
| Lamin B2                              | Monoclonal | Rabbit           | Abcam, Cambridge, United Kingdom                      | ab151735   | 1:2,500         |
| $\alpha$ -Tubulin                     | Monoclonal | Mouse            | DSHB, Iowa, IA, USA                                   | 12G10      | 1:2,000         |
| $\beta$ -actin                        | Monoclonal | Rabbit           | Sigma-Aldrich Chemical, St. Louis USA                 | A2066      | 1:10,000        |
| Antibodies HRP-linked anti-rabbit IgG |            |                  | Cell Signaling Technology, Danvers, MA, USA           | #7074      | 1:10,000        |
| Goat anti-mouse(H+L)                  |            |                  | Invitrogen, Thermofisher Scientific, Waltham, MA, USA | #32430     | 1:2,000         |

\*All blots were visualized using a Femto reagent (Thermofisher Scientific).
